# Supplementary material for: An immature, dedifferentiated, and lineage-deconstrained cone precursor origin of N-Myc–initiated retinoblastoma
Source: PubMed Central journal article supplement — Proc Natl Acad Sci U S A. 2022 Jul 8;119(28):e2200721119. doi: 10.1073/pnas.2200721119 (PMC9282279; doi:10.1073/pnas.2200721119), 2022-07-08
Supplement: pnas.2200721119.sapp.pdf [file pnas.2200721119.sapp.pdf]

# **An immature, dedifferentiated, and lineage-deconstrained cone precursor origin of N-Myc initiated retinoblastoma**

Hardeep P. Singh<sup>a,b,c,\*</sup>,<sup>1</sup>, Dominic W. H. Shayler<sup>a,b</sup>, G. Esteban Fernandez<sup>b</sup>, Matthew E. Thornton<sup>d</sup>, Cheryl Mae Craft<sup>c,e</sup>, Brendan H. Grubbs<sup>d</sup>, and David Cobrinik<sup>a,b,c,f,g,\*</sup>

<sup>a</sup> The Vision Center, Children's Hospital Los Angeles, Los Angeles, CA 90027

<sup>b</sup> The Saban Research Institute, Children's Hospital Los Angeles, Los Angeles, CA 90027

<sup>c</sup> USC Roski Eye Institute, Department of Ophthalmology, Keck School of Medicine, University of Southern California, Los Angeles, CA 90033

<sup>d</sup> Department of Obstetrics and Gynecology, Keck School of Medicine, University of Southern California, Los Angeles, CA 90033

<sup>e</sup> Department of Integrative Anatomical Sciences, Keck School of Medicine of the University of Southern California, Los Angeles, CA 90033, USA

<sup>f</sup> Department of Biochemistry & Molecular Medicine, Keck School of Medicine, University of Southern California, Los Angeles, CA 90033

<sup>g</sup> Norris Comprehensive Cancer Center, University of Southern California, Los Angeles, CA 90033

\*Co-corresponding authors

## **Supporting Information Appendix**

Supplementary Figures S1 – S9

Supplementary Table S1

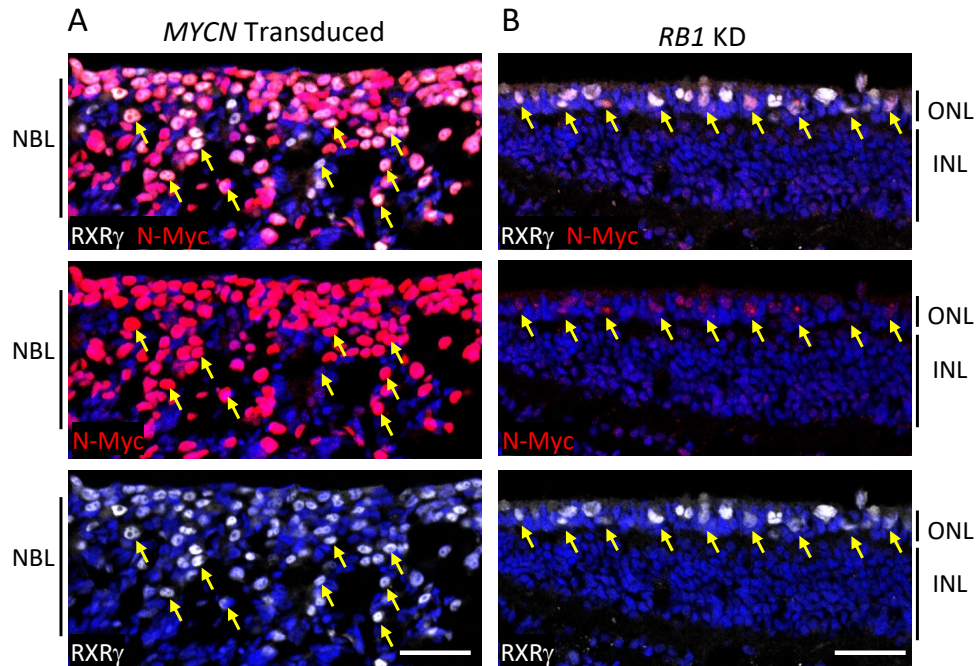

**Figure S1. Higher N-Myc following *MYCN* transduction versus *RB1* knockdown.** N-Myc immunostaining in retinal regions with many  $\text{RXR}\gamma^+$ ,  $\text{Ki67}^+$  cells at 14 days post *BE-MYCN* transduction (A) or 12 days post-infection with *RB1* knockdown construct pLKO.1C-sh*RB1* (18) (B). Cultured retinæ were fixed and processed similarly and immunostained and imaged in parallel with identical settings. The neuroblastic layer (NBL), outer nuclear layer (ONL), and inner nuclear layer (INL) are indicated. Arrows,  $\text{RXR}\gamma^+$ ,  $\text{N-Myc}^+$  cells. Scale bars, 40  $\mu\text{m}$ .

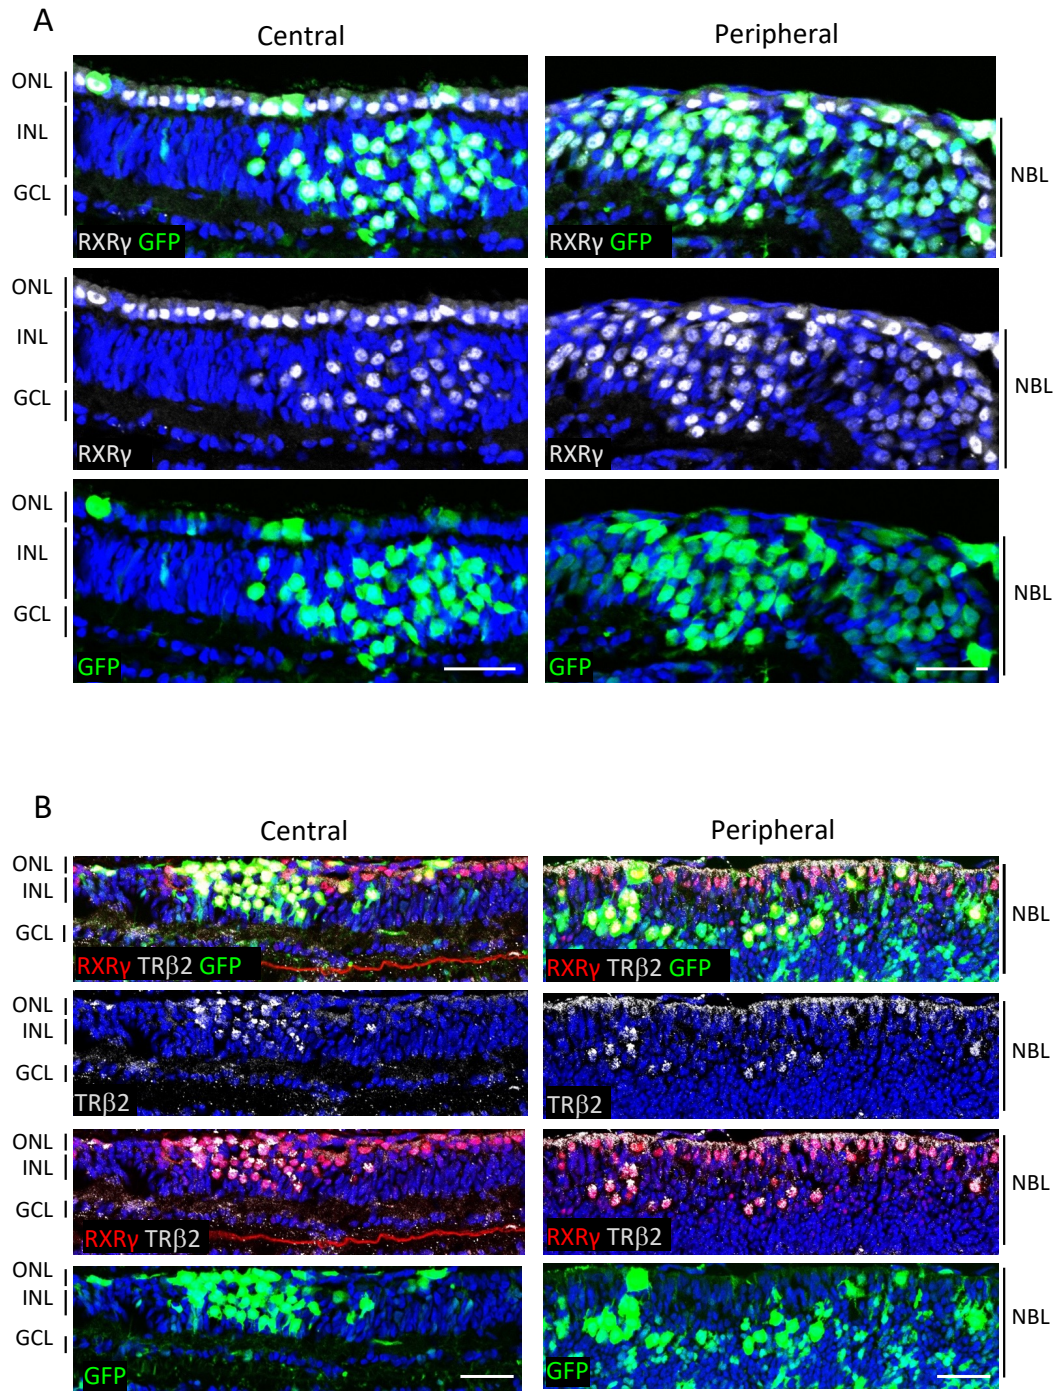

**Figure S2. *MYCN*-induced cone precursor foci in central and peripheral retina.** RXR $\gamma$  (A) and RXR $\gamma$  plus TR $\beta$ 2 (B) immunostaining of foci in central and peripheral regions of the same explanted retina at 12 DIC after *BE-MYCN* transduction. GFP signal represents *BE-MYCN* transduced cells. Scale bars, 40  $\mu$ m.

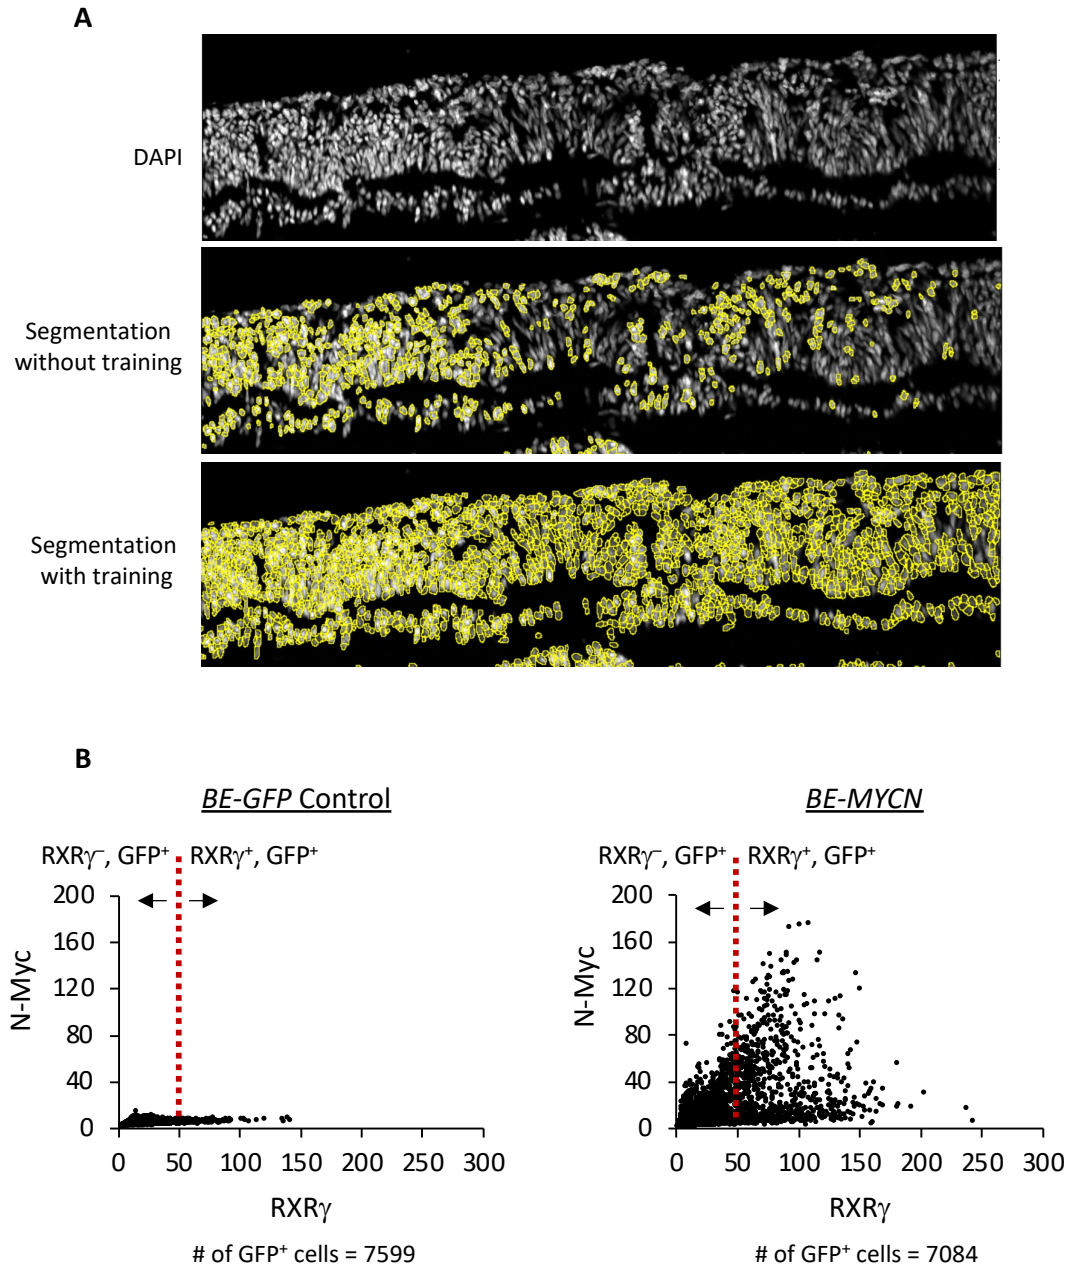

**Figure S3. Trainable Weka based automated segmentation and single-cell quantitation of RXR $\gamma$  and N-Myc expression.** **A.** Representative region of a DAPI-stained explanted retina section segmented with and without WEKA based machine learning. **B.** Quantitation of N-Myc and RXR $\gamma$  expression in 12 DIC retinae transduced with the *BE-GFP* control (*left*) or *BE-MYCN* (*right*) using WEKA and ImageJ. Retina section was co-stained for RXR $\gamma$ , DAPI, and GFP as in Fig. 1C panels iii - iv. Red dotted line marks the threshold of RXR $\gamma$  signal above background determined using a no-primary-antibody control. A plot of N-Myc levels in RXR $\gamma^+$  and RXR $\gamma^-$  cells based on this distribution is shown in Fig. 1F. Similar approaches were used to quantify co-immunostaining of Ki67 or RXR $\gamma$  with different retinal markers.

**A 12 DIC**

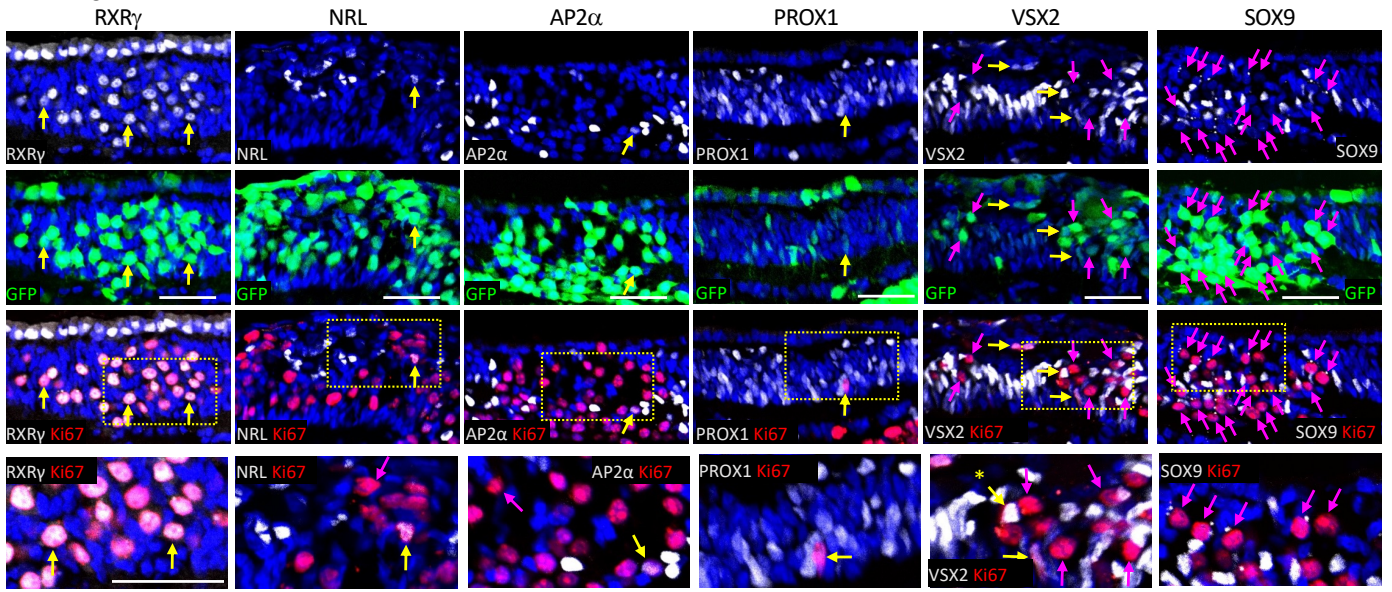

**B 25 DIC**

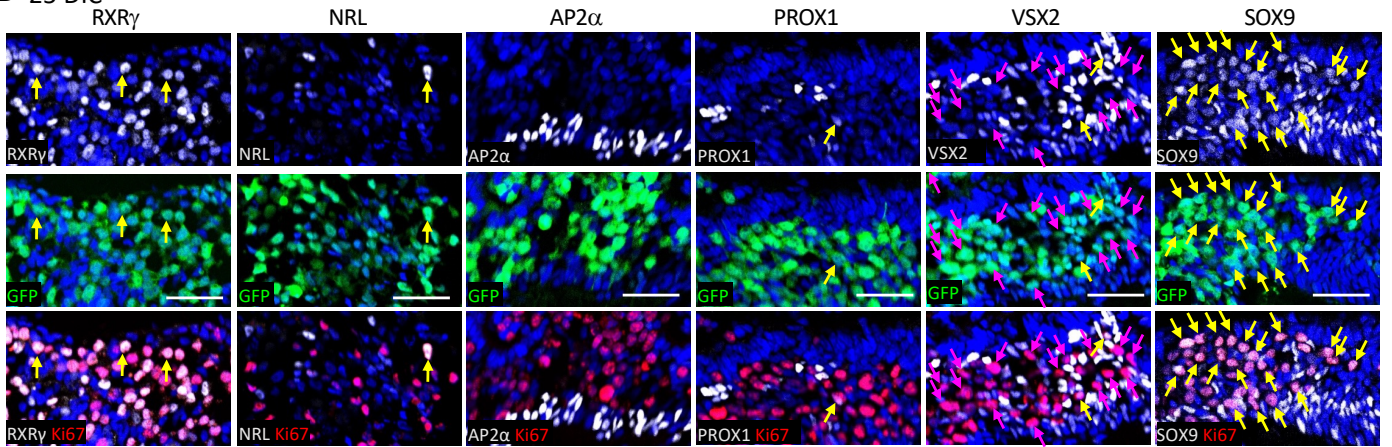

**C 56 DIC**

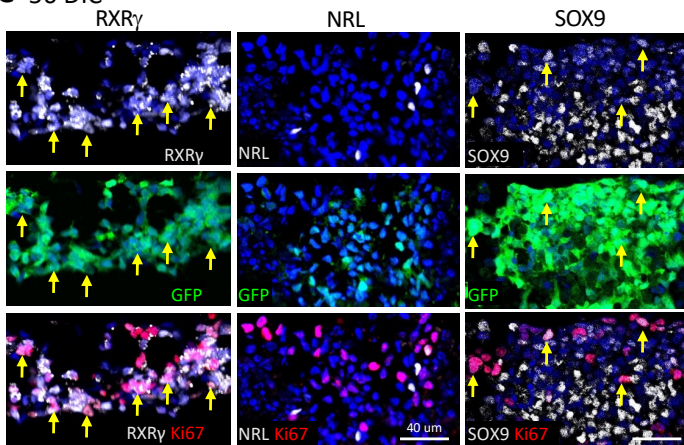

**D**

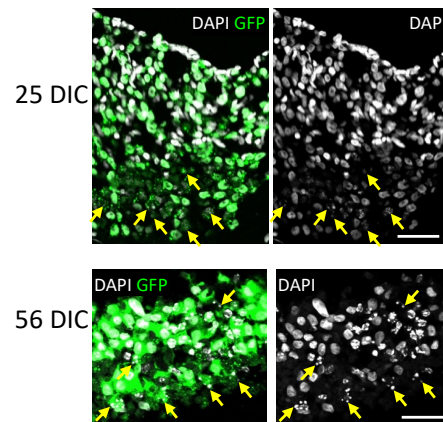

**Figure S4. MYCN-induced cell cycle entry associated with expression of diverse retinal cell type markers.** **A-C.** Representative co-immunostaining of Ki67 (red), the indicated retinal cell type markers (white), and GFP (green) in retinal explants at 12-, 25-, and 56-days post *BE-MYCN* transduction. Yellow arrows, transduced GFP<sup>+</sup>, marker<sup>+</sup>, Ki67<sup>+</sup>. Pink arrows (for VSX2 and SOX9 staining), transduced GFP<sup>+</sup>, marker<sup>-</sup>, Ki67<sup>+</sup>. **D.** At 25 and 56 DIC, many cells in GFP<sup>+</sup> foci had fragmented or undetectable nuclei (arrows) indicative of dead or dying cells. Scale bars, 40  $\mu$ m.

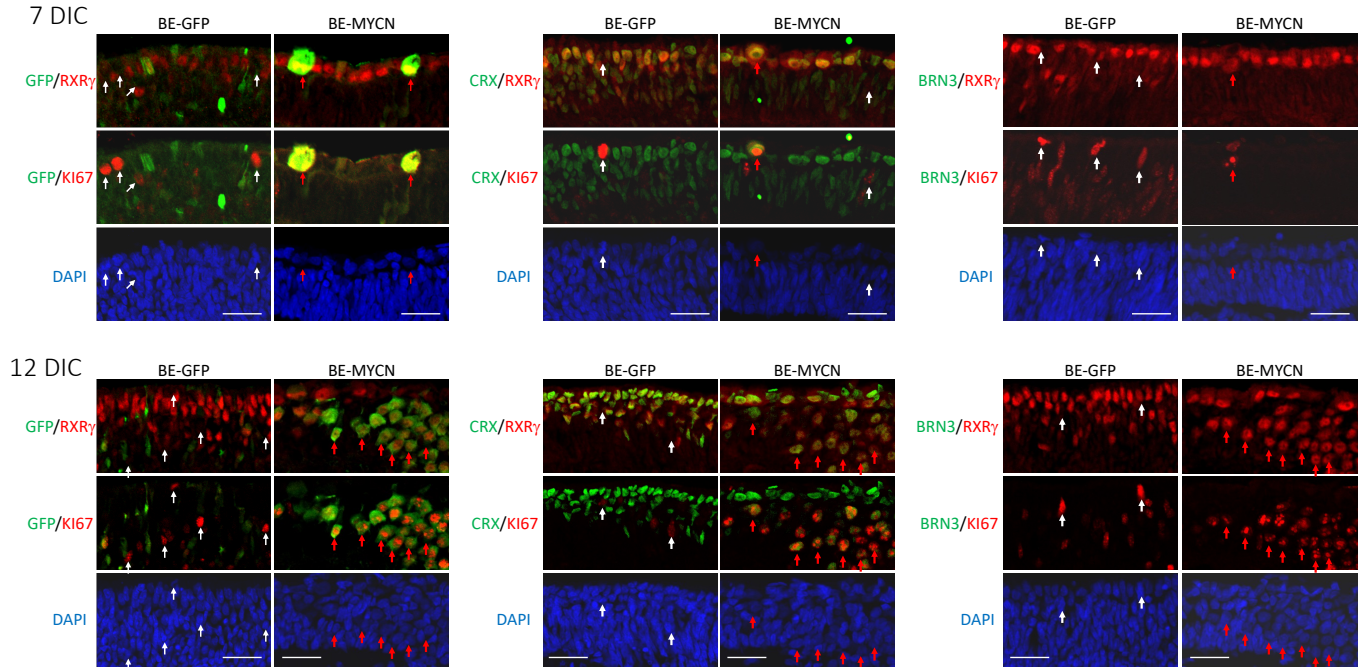

**Figure S5. Expression of cone but not ganglion cell markers in initial *MYCN*-induced proliferating cells.** Explanted retinæ were transduced with *BE-GFP* or *BE-MYCN* and co-stained for GFP/RXR $\gamma$ /Ki67 (*left*), CRX/RXR $\gamma$ /Ki67 (*middle*), or BRN3/RXR $\gamma$ /Ki67 (*right*) and cultured for 7 DIC (*top*) or 12 DIC (*bottom*). Two Ki67<sup>+</sup> populations were observed: White arrows: Ki67<sup>+</sup>, RXR $\gamma$ <sup>-</sup> cells (either GFP<sup>+</sup> or GFP<sup>-</sup>) lacked CRX and BRN3, consistent with proliferating retinal progenitor cells in *BE-GFP* and *BE-MYCN* transduced retina. Red arrows: Ki67<sup>+</sup>, RXR $\gamma$ <sup>+</sup> cells were always GFP<sup>+</sup>, CRX<sup>+</sup>, and BRN3<sup>-</sup> and were seen only in *BE-MYCN*-transduced retina, consistent with *MYCN*-induced proliferating cone precursors. No BRN3<sup>+</sup> cells were detected in either retina at 7 or 12 DIC, consistent with retinal ganglion cell loss after optic nerve transection. (BRN3 staining positive control is shown in Fig. S6.) Scale bars, 25  $\mu$ m.

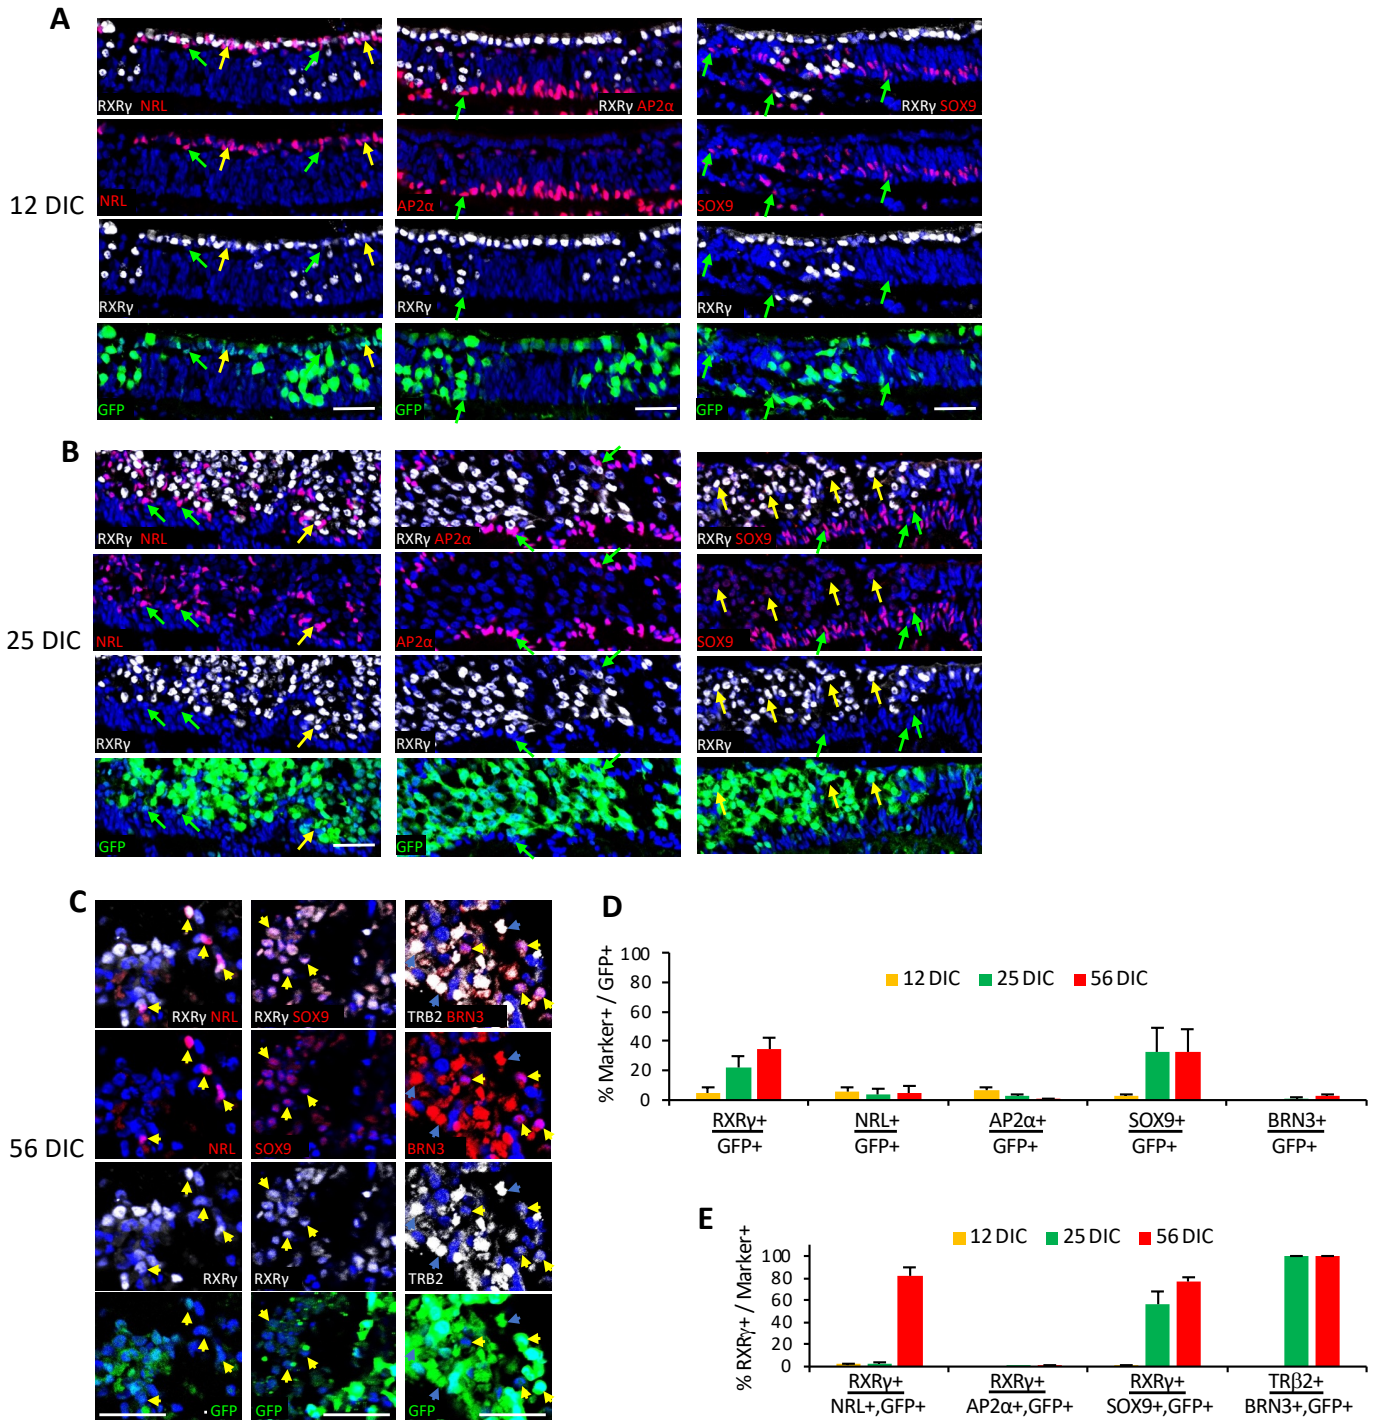

**Fig. S6. Co-expression of cone markers with other cell type-specific markers in *BE-MYCN*-transduced retina. A-C.** Co-staining of RXR $\gamma$  or TR $\beta$ 2 with NRL, AP2 $\alpha$ , SOX9, or BRN3 at 12, 25, and 56 DIC following *BE-MYCN* transduction. Green arrows, cone marker-, other cell type marker<sup>+</sup>; Yellow arrows, cone marker<sup>+</sup>, other marker<sup>+</sup>. Scale bars, 40  $\mu$ m. **D-E.** Machine-learning based quantitation of the percent of transduced (GFP<sup>+</sup>) cells expressing each marker (**D**) and the percent of the transduced marker<sup>+</sup> cells that co-expressed RXR $\gamma$  or TR $\beta$ 2 (**E**).



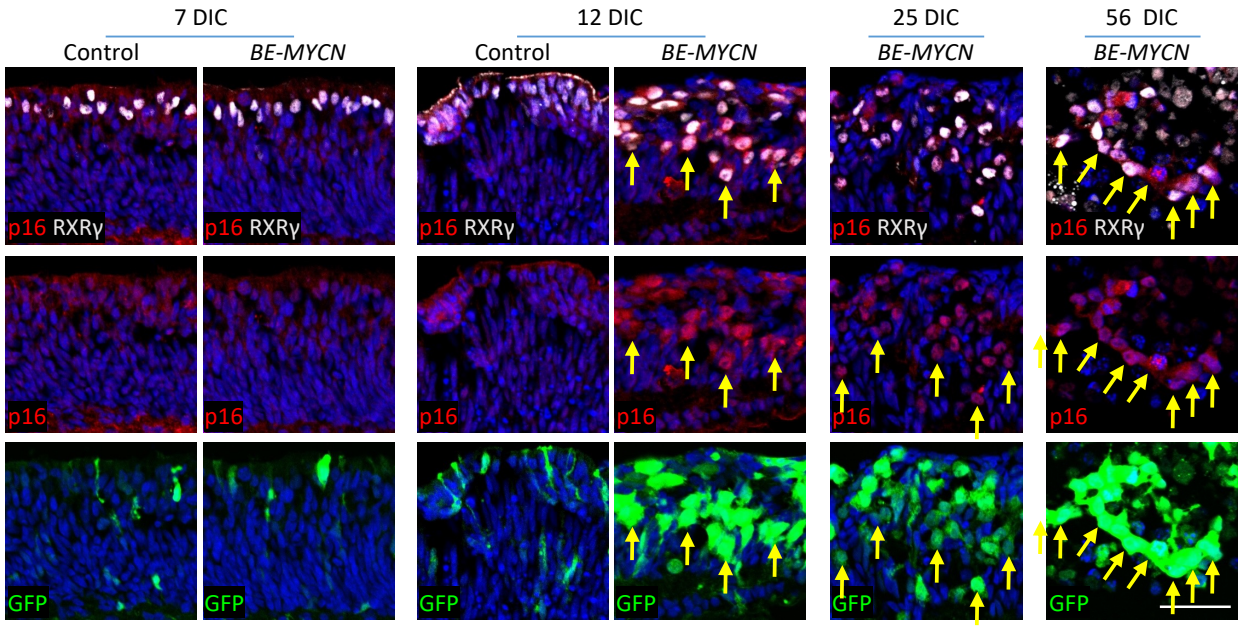

**Fig. S7. *MYCN*-transduced cone precursors continuously over-express p16.** Retinal explants at the indicated days post-infection with *BE-MYCN* or control *BE-GFP* vector and co-stained for p16 and RXR $\gamma$ . Arrows, cells co-expressing p16, RXR $\gamma$ , and GFP. Scale bar, 40  $\mu$ m.

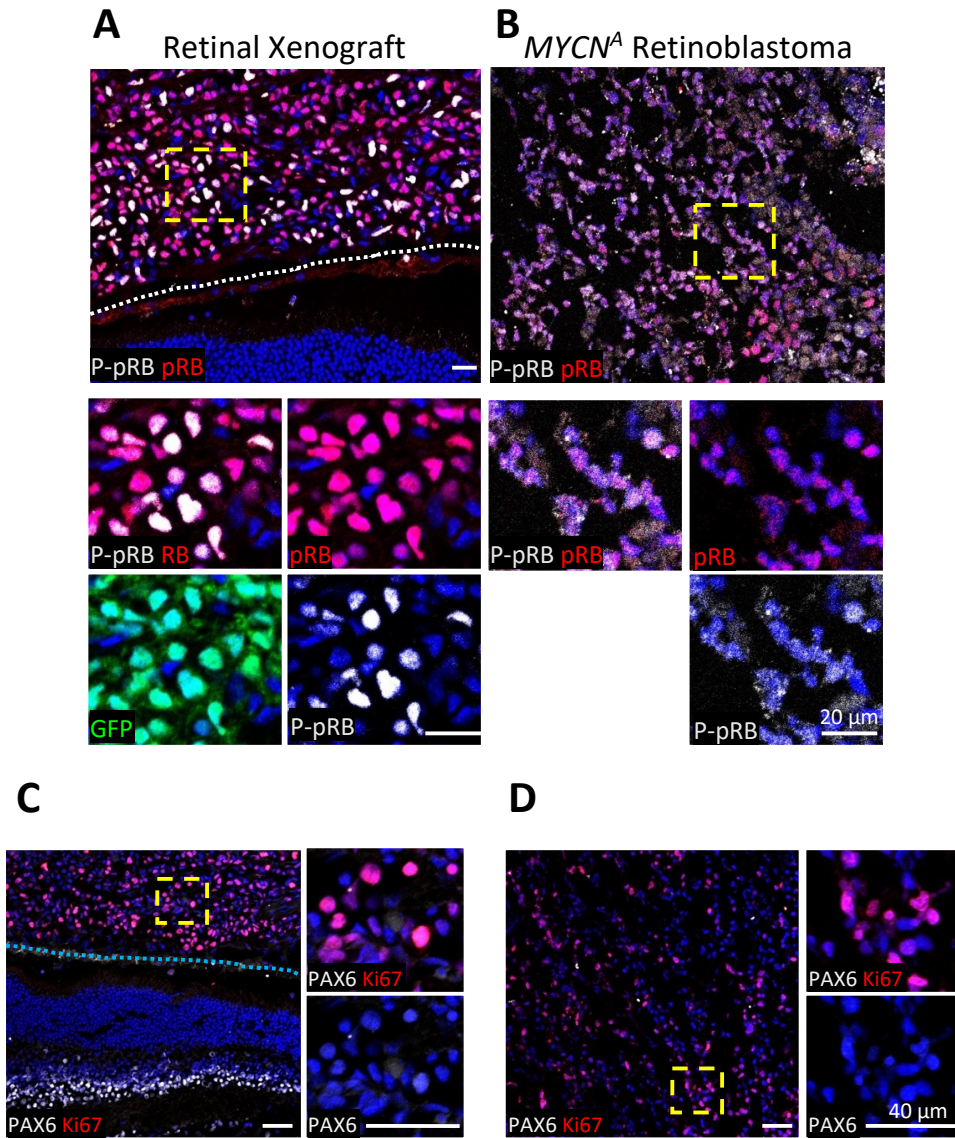

**Fig. S8. Further characterization of *MYCN*-transduced retinal xenografts and *MYCN<sup>A</sup>* retinoblastoma.** (A-B). pRB and p-pRB(S807, S811) co-expression in N-Myc overexpressing retinal xenografts (A) and a *MYCN<sup>A</sup>* retinoblastoma (B). Scale bars, 20  $\mu$ m. (C-D) Lack of detectable PAX6 in retinal xenografts (C) and *MYCN<sup>A</sup>* retinoblastoma (D). Dashed boxes indicate regions shown in enlarged images. Scale bars, 40  $\mu$ m.

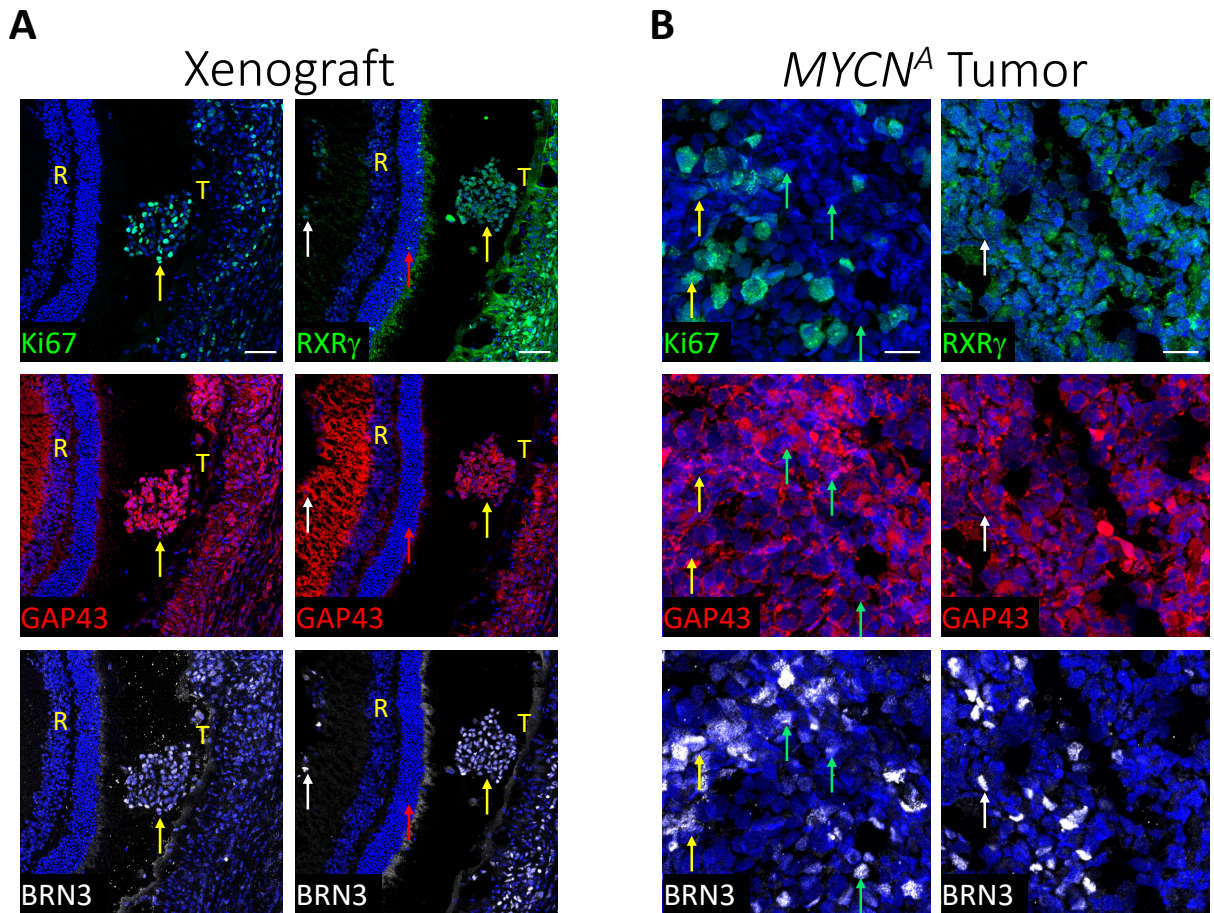

**Figure S9. Co-expression of ganglion cell markers BRN3 and GAP43 in *MYCN*-transduced retinal xenografts and *MYCN*<sup>A</sup> retinoblastoma tumors.** **A.** *MYCN*-transduced retinal xenograft highlighting tumor (T) with widespread co-expression of Ki67, RXR $\gamma$ , GAP43, and BRN3 (yellow arrows) and mouse retina (R) with RXR $\gamma$ <sup>+</sup> but Ki67<sup>-</sup>, GAP43<sup>-</sup>, and BRN3<sup>-</sup> cones (red arrows) and RXR $\gamma$ <sup>+</sup>, GAP43<sup>+</sup>, and BRN3<sup>+</sup> but Ki67<sup>-</sup> ganglion cells (white arrows). **B.** *MYCN*<sup>A</sup> patient tumor was uniformly positive for GAP43 and RXR $\gamma$  but inconsistently expressed BRN3. All BRN3<sup>+</sup> cells were GAP43<sup>+</sup> and RXR $\gamma$ <sup>+</sup> (white arrows) while some were Ki67<sup>+</sup> (yellow arrows) and others Ki67<sup>-</sup> (green arrows). Scale bars, 50  $\mu$ m (A), 25  $\mu$ m (B).

**Table S1. Antibodies used in this study.**

| Name                    | Clone      | Species | Source                               | Catalog #     | Titer            |
|-------------------------|------------|---------|--------------------------------------|---------------|------------------|
| AP2 $\alpha$            | 3B5        | Mouse   | DSHB                                 | 3B5           | 1:20             |
| ARR3 (LUMIf-hCAR)       | -          | Rabbit  | Cheryl Craft (1)                     |               | 1:5000           |
| BRN3                    |            | Goat    | Santa Cruz                           | sc-6026       | 1:50             |
| CDK4                    | DCS-35     | Mouse   | Santa Cruz                           | sc-23896      | 1:50             |
| CHX10 (VSX2)            | -          | Goat    | Santa Cruz                           | sc-21690      | 2:200            |
| CRX                     |            | Mouse   | Abnova                               | H00001406-M02 |                  |
| Cyclin D1               | -          | Rabbit  | Millipore Sigma                      | ABE52         | 1:100            |
| Cyclin D2               | DCS-5      | Mouse   | Santa Cruz                           | sc-53637      | 1:50             |
| Cyclin D3               | D-7        | Mouse   | Santa Cruz                           | sc-6283       | 1:50             |
| GAP43                   |            | Rabbit  | Novus                                | NB300-143     | 1:1000           |
| GFP                     | -          | Goat    | Abcam                                | ab6673        | 1:500            |
| Ki67                    | B56        | Mouse   | BD Biosciences                       | 550609        | 1:200            |
| L/M-Opsin               | -          | Rabbit  | Millipore                            | AB5405        | 1:500            |
| Myc                     | 9E10       | Mouse   | DSHB                                 | 9E10          | 1:1000           |
| N-Myc                   | NCM II-100 | Mouse   | Santa Cruz                           | sc-56729      | 1:100            |
| NRL                     |            | Goat    | R&D Systems                          | AF2945        | 1:120            |
| p16                     | -          | Rabbit  | Proteintech                          | 10883-1-AP    | 1:100            |
| Phospho-Rb (Ser807/811) | -          | Rabbit  | Cell Signaling                       | 9308          | 1:1000           |
| pRB                     | G3-245     | Mouse   | BD Biosciences                       | 554136        | 1:100            |
| PROX1                   | -          | Rabbit  | Angio-Bio                            | 11-002        | 1:1000           |
| RXR $\gamma$            | -          | Rabbit  | Santa Cruz                           | sc-555        | 1:1000,<br>1:800 |
| RXR $\gamma$            | G-6        | Mouse   | Santa Cruz                           | sc-514134     | 1:200            |
| SOX9                    | D8G8H      | Rabbit  | Cell Signaling Technol               | 82630         | 1:1000           |
| TEAD4                   | 1G7        | Mouse   | Developmental Studies Hybridoma Bank | PCRP-TEAD4    | 1:75             |
| TR $\beta$ 2            | -          | Rabbit  | Santa Cruz                           | sc-67123      | 1:600            |

**Supporting Information Reference:**

1. A. Li, X. Zhu, B. Brown B, C.M. Craft, Gene expression networks underlying retinoic acid induced differentiation of human retinoblastoma cells. Invest. Ophthalmol. Vis. Sci. 44, 996-1007 (2003).
